# Supplementary material
Source: publisher figshare collection journal article supplement (https://frontiersin.figshare.com/ndownloader/files/27045410)
Supplement: Supplementary file 1 [file 27045410]

## Sheet: Bulk
Sample				Environment																δ18O	δ13C	δ18O	δ13C	δ18O	δ13C	δ18O		δ13C		Me/Ca
Coral	Ocean	Lon	Lat	Depth avg	Temp	ΔT	Salinity	Alk	ΔAlk	DIC	ΔDIC	pH(Alk,DIC)	err pH	Omega	err Omega	[CO3]	err [CO3]	Δ[CO3]	err Δ[CO3]	rep1	rep1	rep2	rep2	rep3	rep3	avg	stdev	avg	stdev	U/Ca	err U/Ca	Mg/Ca	err Mg/Ca	Sr/Ca	err Sr/Ca	B/Ca	err B/Ca
19249	NE Pacific	240.487	33.9667	274	7.8	0.8	34.2509	2285	5	2245	10	7.6662	0.0193284	0.811784	0.032897	56.2553	2.27698	-13.0385	2.29543	1.153	-4.825	1.178	-4.62	0.907	-5.023	1.07933	0.149768	-4.82267	0.20151	1.86792	0.0154925	2.84833	0.00473552	10.2414	0.0117556	790.256	2.64581
BigBeauty	Southern Ocean-SW-ATL	297.784	-54.734	816	3.6	0.3	34.277	2323	5	2190	20	7.98793	0.0277089	1.30429	0.0741186	100.822	5.72857	23.5126	5.72901	2.669	-2.808	2.159	-3.133	2.158	-2.63	2.32867	0.294738	-2.857	0.255055	1.99603	0.00340014	2.54643	0.0060703	10.4574	0.0132001	781.536	0.816841
47409	Southern Ocean ATL	320.633	-54.4833	672.5	1.9	0.3	34.6546	2349	2	2260	10	7.88497	0.0155523	1.02379	0.0333596	77.4214	2.51894	1.81427	2.52178	2.193	-3.84	2.736	-2.549	2.452	-2.889	2.46033	0.271596	-3.09267	0.669164	2.0572	0.00784287	2.15862	0.00687222	10.349	0.00798496	708.861	4.39797
Leda-b	Southern Ocean SW- PAC	147.269	-44.3243	1460	2.9	0.2	34.5665	2320	5	2240	10	7.81371	0.0174815	0.816853	0.0305827	71.4884	2.676	-16.0293	2.6796	2.907	-3.16	2.791	-3.318	2.797	-3.337	2.83167	0.0653095	-3.27167	0.0971717	2.09977	0.00883608	2.12261	0.00911398	9.97543	0.0140048	641.979	3.59667
Leda-t	Southern Ocean SW- PAC	147.269	-44.3243	1460	2.9	0.2	34.5665	2320	5	2240	10	7.81368	0.0174953	0.8168	0.0306206	71.4838	2.67904	-16.0303	2.67351	2.973	-2.804	2.998	-2.853	2.975	-2.644	2.982	0.0138924	-2.767	0.109302	2.15875	0.00532162	2.03474	0.00618519	9.92175	0.0077102	596.259	1.87762
Gaia	Southern Ocean SW- PAC	150.321	-44.803	2395	2.1	0.1	34.7227	2347	5	2250	5	7.83537	0.0104279	0.749114	0.0169652	78.3812	1.77477	-26.25	1.7843	3.362	-1.529	3.645	-1.173	3.302	-1.776	3.43633	0.183184	-1.49267	0.303137	2.51235	0.00835851	1.61317	0.01272	10.1512	0.00815112	520.342	3.00951
83583	NE Pacific	232.212	32.9133	464	6	0.1	34.101	2293	5	2277	5	7.60226	0.0120219	0.645197	0.0174307	46.419	1.25399	-25.529	1.256	2.163	-3.189	2.162	-2.833	1.962	-3.602	2.09567	0.11576	-3.208	0.384852	2.12465	0.0493539	2.06163	0.032676	10.4525	0.0389486	723.824	9.06183
82065	Southern Ocean PAC	230.183	-54.8333	585.5	5.3	1	34.2965	2278	3	2132	10	8.00368	0.0154337	1.47232	0.0407879	108.428	2.9828	34.7942	2.98836	-0.272	-7.234	-0.105	-7.145	-0.166	-7.186	-0.181	0.0845044	-7.18833	0.0445459	1.35715	0.0213255	3.39259	0.0198737	10.4013	0.0101759	601.428	5.03561
94071	SW Pacific	173.28	-30.7167	615	9	0.3	34.5981	2292	5	2145	3	7.95296	0.00754442	1.50476	0.0233895	110.532	1.7159	37.0886	1.71548	1.976	-1.252	1.724	-1.256	1.628	-1.44	1.776	0.179733	-1.316	0.107406	1.88387	0.00244925	2.92407	0.0602665	10.1616	0.00734681	800.928	3.05118
47407	Southern Ocean PAC	230.2	-54.8167	549	5.5	1	34.3038	2277	3	2134	10	7.99451	0.0156017	1.46185	0.0407942	106.893	2.97363	33.7647	2.96884	0.086	-7.528	0.153	-7.47	0.24	-7.69	0.159667	0.0772161	-7.56267	0.114023	1.34593	0.00435071	3.3241	0.00439355	10.2765	0.00759896	755.26	3.34484
84820	E EQ Pacific	268.392	0.243333	806	5.9	0.1	34.5815	2340	3	2295	7	7.68336	0.012472	0.758907	0.0205866	58.2249	1.57934	-18.4929	1.5763	1.294	-3.346	1.334	-3.765	1.26	-3.737	1.296	0.0370405	-3.616	0.234246	1.98245	0.00739487	2.60922	0.00287525	10.2842	0.0112539	789.211	2.84949
62309	NE Atlantic	292.344	40.3794	521.5	5.7	1	34.9937	2312	3	2180	5	7.96045	0.0109673	1.39196	0.0272308	101.61	1.64892	28.602	1.83899	-0.248	-8.15	-0.432	-8.205	-0.355	-7.745	-0.345	0.0924067	-8.03333	0.251214	1.31174	0.00458746	3.4973	0.00376352	10.2996	0.0125653	802.815	2.55481
47394	Southern Ocean SW- PAC	162.017	-51	352	5.7	1	34.4126	2283	3	2115	5	8.06793	0.0103354	1.72553	0.0250331	121.838	1.73404	51.2143	1.75816	1.104	-4.643	1.926	-3.246	1.45	-4.296	1.49333	0.41271	-4.06167	0.727383	1.56625	0.00560931	2.64156	0.00589242	10.3115	0.00897575	781.663	2.30335
53377	Southern Ocean SW-PAC	167.833	-51.1	210	7.1	0.5	34.3632	2285	3	2113	5	8.06259	0.00783965	1.82465	0.0255515	125.222	1.75018	56.592	1.75128	0.69	-4.741	1.362	-3.094	1.238	-3.594	1.09667	0.357599	-3.80967	0.844415	1.59518	0.00710939	3.72662	0.00727221	10.2938	0.0112993	852.26	2.81247
48744	Mediterranean	9.76667	43.3167	627.5	13.1	0.1	38.6995	2605	3	2321	2	8.08715	0.00304736	2.73643	0.0183464	203.361	1.1893	129.043	1.22213	2.546	0.033	2.166	-0.507	2.727	0.297	2.47967	0.286322	-0.059	0.409819	1.86033	0.00409731	2.61479	0.0205151	10.0066	0.00616966	828.92	3.45628
80404	Mediterranean	355.763	35.4417	395	13.2	0.1	38.503	2585	3	2332	3	8.04478	0.00375143	2.57211	0.0190935	183.762	1.36	112.31	1.36935	1.049	-4.152	1.059	-4.119	1.119	-3.922	1.07567	0.0378594	-4.06433	0.124364	1.59969	0.00618319	3.24005	0.0122337	9.90369	0.0123976	850.29	2.45067
80358	NW Atlantic	352.155	47.9583	358	11.2	0.1	35.5993	2336	2	2135	10	8.04043	0.0109514	2.06607	0.0440864	144.992	3.09373	74.8137	3.10113	-0.307	-6.529	-0.159	-5.949	-0.289	-6.047	-0.251667	0.0807548	-6.175	0.310464	1.43376	0.0058484	3.26872	0.0112091	10.09	0.0098499	742.084	2.94458
47413	Southern Ocean SW-PAC	167.633	-50.6333	421	6.8	0.4	34.3592	2287	3	2118	8	8.05126	0.0106363	1.72213	0.0354416	122.839	2.52579	51.5098	2.5282	0.738	-6.266	0.051	-7.471	0.904	-5.846	0.564333	0.452241	-6.52767	0.84351	1.49247	0.00987909	3.22722	0.0179937	10.1209	0.018071	751.693	4.85123
Titan-b	Southern Ocean SW- PAC	147.272	-44.3899	2066	2.4	0.2	34.7108	2341	5	2252	5	7.82133	0.0107996	0.764251	0.0178722	75.099	1.75495	-23.1797	1.74953	1.026	-6.429	0.784	-6.935	1.313	-5.447	1.041	0.264819	-6.27033	0.756583	1.65585	0.00606625	2.20111	0.00728069	9.64952	0.00840976	665.289	2.23488
Titan-t	Southern Ocean SW- PAC	147.272	-44.3899	2066	2.4	0.2	34.7108	2341	5	2252	5	7.82123	0.0107686	0.764056	0.017828	75.0801	1.75041	-23.1763	1.75036	2.085	-4.892	2.58	-3.907	1.802	-4.807	2.15567	0.393785	-4.53533	0.54581	1.96452	0.00324481	1.99851	0.00933856	9.82821	0.0221739	625.998	2.55079
97275	South China Sea	117.613	21.7017	421	9	0.4	34.4136	2286	10	2086	10	8.08683	0.0153618	1.99596	0.0616573	141.645	4.37165	70.6658	4.38934	0.621	-5.673	0.775	-6.249	0.016	-6.932	0.470667	0.401211	-6.28467	0.630257	1.42367	0.00193598	3.67561	0.0105942	10.1754	0.00793474	713.72	8.26867

## Sheet: Micromill
Samples				Isotopes		Me/Ca				Me/Ca StdErr
Coral	Sample Name	COC (1=Yes, 0=No)	Position (mm)	d18O	d13C	B /Ca(umol/mol)	Mg/Ca(mmol/mol)	Sr/Ca(mmol/mol)	U /Ca(umol/mol)	B /Ca(umol/mol)	Mg/Ca(mmol /mol)	Sr/Ca(mmol /mol)	U /Ca(umol/mol)
BigBeauty	B11	0	30.594	3.905	0.173	705.347	2.00296	10.3741	2.3027	1.72591	0.00462	0.01848	0.01281
	B12	0	30.694	4.1	1.133	609.483	1.54783	10.6351	2.674	1.43399	0.00268	0.01661	0.01531
	B13	0	30.794	4.532	2.168	651.048	2.0355	10.3715	2.54272	3.40275	0.00398	0.00954	0.01456
	B14	0	30.894	3.513	-0.633	693.527	1.8397	10.3661	2.31855	0.90724	0.0026	0.00737	0.00895
	B15	0	31.365	1.925	-3.917	734.304	2.59074	10.4102	1.93827	1.69133	0.00509	0.01422	0.0117
	B16	0	31.465	2.761	-1.733	740.306	2.44607	10.2956	2.19419	2.75989	0.00534	0.01304	0.01238
	B17	0	31.565	3.296	-0.429	737.899	2.08931	10.1951	2.24534	3.6751	0.00669	0.02211	0.01472
	B18	0	31.851	2.461	-1.859	710.791	2.50093	10.4607	2.17802	0.72078	0.00643	0.01218	0.00735
	B19	0	32.001			680.182	2.24555	10.5035	2.39928	1.61585	0.00581	0.02549	0.01462
	B20	0	31.701	2.716	-0.993	707.09	1.99126	10.3321	2.29883	0.82713	0.0039	0.01074	0.0173
	B21	0	31.551	3.055	-0.414	662.949	1.70678	10.4397	2.46271	1.67366	0.00369	0.00687	0.01243
	B23	0	32.058	3.151	-0.655	705.998	2.47468	10.3716	2.43637	5.34797	0.00801	0.0092	0.0143
	B24	1	31.908	1.407	-4.014	720.756	3.00033	10.5286	1.8532	6.16298	0.01651	0.01465	0.01235
	B25	0	31.758	1.134	-5.649	833.468	2.89241	10.303	1.6077	3.78681	0.00437	0.01009	0.01055
	B26	0	31.458	1.264	-5.445	812.847	2.58767	10.2518	1.56293	8.56938	0.00402	0.01714	0.00805
47407D	K11	0	27.144	2.689	-2.366	792.903	2.34204	10.2653	1.96598	3.90205	0.00543	0.01268	0.01343
	K12	0	27.244	1.748	-4.662	845.119	2.34159	10.2558	1.87243	3.23631	0.00952	0.01038	0.00762
	K13a	0	27.289	0.229	-7.946	809.114	3.3683	9.9225	1.21772	2.56436	0.00915	0.01503	0.00926
	K13b	0	27.289	0.145	-8.011	790.408	3.52295	9.93216	1.19106	2.8731	0.00877	0.01108	0.0092
	K14	1	27.409	0.425	-6.9	780.738	3.32083	10.0148	1.33972	1.21325	0.00628	0.00963	0.00836
	K15	0	27.529	1.31	-5.62	839.379	3.18152	10.045	1.44681	2.41074	0.00401	0.01386	0.00612
	K16	0	18.783	1.438	-5.002	757.128	2.77171	10.0438	1.781	1.76786	0.00813	0.01563	0.00887
	K17	1	18.903	0.089	-7.235	776.436	3.38304	9.97419	1.34685	3.63784	0.00877	0.00832	0.00889
	K18	0	19.023	0.34	-7.579	812.64	3.4721	10.0074	1.33356	2.64714	0.00355	0.01581	0.0059
	K19	0	19.153	0.579	-7.387	845.854	3.33447	9.87817	1.23465	1.9782	0.00897	0.00928	0.00862
	K20	0	23.979			881.287	3.13292	10.1242	1.62727	2.13571	0.01082	0.01422	0.00989
	K21	0	23.624			825.976	2.27544	10.1323	1.97025	1.52247	0.00551	0.01539	0.00862
47394	N11	0	21.489	1.802	-2.247	820.717	2.2066	10.1458	1.74396	2.33469	0.00542	0.00874	0.00687
	N12	0	21.629	0.928	-4.333	878.142	2.67625	10.3212	1.57437	2.00827	0.00756	0.02067	0.01177
	N13	0	21.769	1.594	-2.909	833.471	2.25597	10.1327	1.7268	2.11819	0.00674	0.00647	0.00445
	N14	0	21.909	0.925	-3.659	799.662	2.12621	10.0696	1.84471	2.45292	0.00649	0.02018	0.00976
	N15	0	22.029	0.618	-4.844	830.981	2.8084	10.1576	1.51599	3.41527	0.0059	0.01899	0.00668
	N16	1	22.169	-0.583	-7.027	709.624	3.53557	10.2897	1.15641	4.61261	0.02055	0.05727	0.0076
	N17	0	22.269	0.161	-5.559	835.067	2.91433	10.2166	1.4631	9.11908	0.01614	0.05838	0.00882
	N18	0	22.389	2.077	-1.118	782	2.16724	10.2348	2.03386	5.28472	0.0115	0.05693	0.01404
	N19	0	22.509	1.902	-1.847	809.188	2.00425	10.0922	1.97482	3.07144	0.0065	0.01311	0.01115
	N20	0	22.629	1.733	-2.39	840.137	2.15301	9.81022	1.65169	3.23402	0.00907	0.0198	0.0117
	N21	0	22.749	1.568	-2.829	864.915	2.19631	10.0522	1.71775	6.77696	0.00598	0.0159	0.01001
	N22	0	25.411	1.936	-1.507	771.547	2.44369	10.1867	1.81929	9.71213	0.00527	0.02913	0.01572
	N23	0	23.279	2.94	0.97	723.489	1.9267	10.3181	2.05179	10.403	0.0076	0.02145	0.01185
48744	P11	0	26.921	2.114	-1.383	822.541	2.56994	9.7741	1.65475	2.10635	0.00365	0.01309	0.00992
	P12	0	27.071	1.254	-3.393	765.096	2.70967	9.8794	1.69062	1.91145	0.00558	0.01075	0.00657
	P13	0	27.221	1.545	-2.608	758.248	2.61423	9.79125	1.68158	1.53027	0.00659	0.00948	0.0088
	P14	0	27.371	1.617	-2.498	749.508	2.44918	9.79711	1.74221	1.9737	0.00629	0.01691	0.00829
	P15	0	27.521	1.621	-1.991	776.031	2.42447	9.83646	1.80002	2.5125	0.00407	0.00818	0.01089
	P16	0	27.641	2.095	-0.968	753.555	2.20094	9.89946	1.93525	1.74716	0.006	0.00839	0.01018
	P17	0	27.791	1.953	-1.689	789.402	2.43997	9.80505	1.73697	2.67839	0.00914	0.01263	0.00978
	P18	1	27.941	0.237	-5.173	839.52	2.41648	9.90969	1.76079	1.85151	0.0052	0.01	0.00745
	P19	1	28.091	0.286	-5.195	718.314	2.55992	9.95615	1.79956	1.48685	0.00651	0.01084	0.00961
	P20	1	28.241	1.15	-3.552	751.872	2.70239	9.90839	1.58041	1.94844	0.00809	0.01444	0.00753
Gaia	G11	0	28.305	2.238	-4.431	586.9	1.61722	9.69421	2.11456	1.12472	0.00179	0.01594	0.00911
	G12	0	28.445	2.078	-4.384	605.443	1.65144	9.67852	2.06019	0.6073	0.00551	0.01507	0.0101
	G13	1	28.585	1.165	-5.708	617.141	2.08636	9.84525	1.77537	1.26066	0.00367	0.01622	0.01405
	G14	0	28.725	1.52	-5.448	617.694	1.7924	9.72369	2.13615	2.03299	0.00399	0.01519	0.01137
	G15	0	28.875	1.507	-5.548	649.036	1.96484	9.75385	1.84298	0.94178	0.00419	0.01812	0.01259
	G16	0	29.025	1.344	-6.737	619.836	1.68517	9.60962	1.9353	1.87045	0.00303	0.00938	0.01068
	G17	0	29.175	1.438	-6.053	650.13	1.7855	9.55445	1.79502	2.2225	0.00356	0.01337	0.01041
	G18	1	29.325	1.312	-6.536	615.131	1.63436	9.55299	1.89656	1.88647	0.00337	0.0132	0.01545
	G19	0	28.934	1.532	-5.265	649.522	1.85577	9.73739	1.93039	1.43117	0.00477	0.0188	0.00918
	G20	0	32.725	2.342	-3.714	578.7	1.53832	9.64389	2.10124	1.69364	0.00376	0.0089	0.01381
	G21	0	30.105	3.779	0.033	520.348	1.27618	10.0411	2.66029	1.68064	0.00427	0.0132	0.01533
62309	M12	0	24.852	2.312	-3.088	397.203	1.50782	8.77384	2.14284	3.3936	0.00756	0.01049	0.0851235
	M13	0	24.972	2.104	-3.355	410.322	1.5637	8.92138	2.16316	2.58743	0.0054	0.01643	0.0855167
	M14	0	25.072	2.572	-2.592	643.752	2.34142	9.7251	2.5376	10.8585	0.0195	0.01929	0.0870316
	M15a	1	27.269	-0.421	-7.946	650.677	2.96192	10.0866	1.40158	4.30499	0.00634	0.01352	0.034105
	M15b	1	27.269	-0.351	-7.884	569.238	2.81243	10.0165	1.56298	6.08378	0.0096	0.01402	0.0374462
	M16	1	27.635	-0.759	-8.446	375.959	2.69302	9.55406	1.23201	3.8311	0.01428	0.01605	0.0375685
	M17	0	27.708	0.089	-7.696	413.973	2.5394	9.22257	1.33083	4.4905	0.01765	0.01536	0.0377585
	M18	0	27.808	0.031	-7.148	433.782	2.54142	8.88235	1.47926	4.5999	0.00694	0.01321	0.0428573
	M19	0	27.908	0.487	-6.06	400.183	2.15053	8.61131	1.53578	2.61867	0.01066	0.00711	0.0646232
	M20	0	28.018	0.942	-5.251	485.685	2.03138	8.87183	1.7059	6.1326	0.01535	0.0118	0.0517681
	M21	0	28.128	0.642	-6.564	359.061	2.01069	8.51128	1.53797	4.21447	0.01128	0.00569	0.06485
	M22	0	28.258	0.113	-7.207	302.093	2.14842	8.55757	1.44485	2.25263	0.0087	0.01559	0.0402042
	M23	1	28.388	-0.571	-7.465	308.682	2.35109	8.59601	1.26275	1.89592	0.01485	0.0056	0.0563033

## Sheet: U speciation
Reaction	log β	Source
UO2(2+) + CO3(2-) = UO2CO3	8.61	Endrizzi&Rao (2014)
UO2(2+) + 2 CO3(2-) = UO2(CO3)2 (2-)	15.26	Endrizzi&Rao (2014)
UO2(2+) + 3 CO3(2-) = UO2(CO3)3 (4-)	21.85	Endrizzi&Rao (2014)
Ca(2+) + UO2(2+) + 3 CO3(2-) = CaUO2(CO3)3(2-)	24.28	Endrizzi&Rao (2014)
2 Ca(2+) + UO2(2+) + 3CO3(2-) = Ca2UO2(CO3)3	26.81	Endrizzi&Rao (2014)
Mg(2+) + UO2(2+) + 3CO3 (2-) = MgUO2(CO3)3 (2-)	23.62	Endrizzi&Rao (2014)
UO2(2+) + H2O = UO2OH(+) + H(+)	-5.75	Guillaumont et al. (2003)
UO2(2+) + 2 H2O = UO2(OH)2 + 2 H(+)	-12.29	Guillaumont et al. (2003)
UO2(2+) + 3 H2O = UO2(OH)3 (-) + 3 H(+)	-19.89	Guillaumont et al. (2003)
